# Supplementary material for: Effects of Allopolyploidization and Homoeologous Chromosomal Segment Exchange on Homoeolog Expression in a Synthetic Allotetraploid Wheat under Variable Environmental Conditions
Source: MDPI journal article supplement (doi:10.3390/plants12173111), 2023-08-30
Supplement: s1 [file s1]

**Table S1. Summary of the numbers of DEG between genotypes.**

| Comparison  | Condition    | A-DEG | D-DEG | Up-regulated | Down-regulated | Total |
|-------------|--------------|-------|-------|--------------|----------------|-------|
| EUP vs Mix  | Mock-2day    | 1807  | 3410  | 2331         | 2886           | 5217  |
|             | PEG6000-2day | 2321  | 3787  | 2840         | 3268           | 6108  |
|             | Mock-5day    | 567   | 760   | 691          | 636            | 1327  |
|             | NaCl-5day    | 1120  | 1845  | 1393         | 1572           | 2965  |
| X190 vs Mix | Mock-2day    | 2361  | 3620  | 2324         | 3657           | 5981  |
|             | PEG6000-2day | 1979  | 4005  | 3229         | 2755           | 5984  |
|             | Mock-5day    | 3184  | 4694  | 3953         | 3925           | 7878  |
|             | NaCl-5day    | 1748  | 4624  | 3576         | 2796           | 6372  |

**Table S2. Summary of the proportions of DEG between genotypes.**

| Comparison  | Condition    | A-DEG | D-DEG | Up-regulated | Down-regulated | Total |
|-------------|--------------|-------|-------|--------------|----------------|-------|
| EUP vs Mix  | Mock-2day    | 0.120 | 0.185 | 0.136        | 0.169          | 0.305 |
|             | PEG6000-2day | 0.155 | 0.206 | 0.168        | 0.192          | 0.360 |
|             | Mock-5day    | 0.038 | 0.041 | 0.041        | 0.038          | 0.079 |
|             | NaCl -5day   | 0.075 | 0.100 | 0.083        | 0.092          | 0.175 |
| X190 vs Mix | Mock-2day    | 0.157 | 0.196 | 0.138        | 0.216          | 0.354 |
|             | PEG6000-2day | 0.132 | 0.217 | 0.189        | 0.160          | 0.349 |
|             | Mock-5day    | 0.212 | 0.255 | 0.234        | 0.233          | 0.467 |
|             | NaCl -5day   | 0.116 | 0.251 | 0.207        | 0.160          | 0.367 |

**Table S3. Summary of the number of DEGs and four homoeologous expression modes in EUP vs Mix**

| EUP vs Mix |    |           |        |        |        |              |        |        |        |           |        |        |        |           |        |        |        |
|------------|----|-----------|--------|--------|--------|--------------|--------|--------|--------|-----------|--------|--------|--------|-----------|--------|--------|--------|
| Type       |    | Mock (2d) |        |        |        | PEG6000 (2d) |        |        |        | Mock (5d) |        |        |        | NaCl (5d) |        |        |        |
|            |    | Mode 4    | Mode 5 | Mode 6 | Mode 7 | Mode 4       | Mode 5 | Mode 6 | Mode 7 | Mode 4    | Mode 5 | Mode 6 | Mode 7 | Mode 4    | Mode 5 | Mode 6 | Mode 7 |
|            |    |           |        |        |        |              |        |        |        |           |        |        |        |           |        |        |        |
| A↑         | D↑ | 10        | 2      | 0      | 2      | 8            | 1      | 6      | 1      | 0         | 0      | 0      | 0      | 1         | 5      | 0      | 0      |
| A=         | D↑ | 128       | 0      | 0      | 33     | 100          | 0      | 0      | 45     | 14        | 0      | 0      | 5      | 41        | 0      | 0      | 14     |
| A↓         | D↑ | 5         | 0      | 0      | 2      | 0            | 0      | 0      | 2      | 0         | 0      | 0      | 0      | 5         | 0      | 0      | 2      |
| A=         | D↓ | 0         | 51     | 24     | 0      | 0            | 78     | 47     | 0      | 0         | 13     | 11     | 0      | 0         | 66     | 35     | 0      |
| A↓         | D↓ | 3         | 2      | 4      | 3      | 7            | 6      | 5      | 4      | 0         | 0      | 0      | 0      | 2         | 1      | 2      | 0      |
| A↓         | D= | 64        | 0      | 0      | 39     | 81           | 0      | 0      | 62     | 25        | 0      | 0      | 15     | 82        | 0      | 0      | 46     |
| A↑         | D↓ | 0         | 0      | 1      | 0      | 0            | 1      | 1      | 0      | 0         | 0      | 0      | 0      | 0         | 1      | 0      | 0      |
| A↑         | D= | 0         | 17     | 10     | 0      | 0            | 69     | 31     | 0      | 0         | 27     | 9      | 0      | 0         | 56     | 13     | 0      |
| A=         | D= | 215       | 207    | 97     | 125    | 205          | 198    | 120    | 146    | 266       | 192    | 142    | 177    | 305       | 274    | 160    | 158    |

**Table S4. Summary of the number of DEGs and four homoeologous expression modes in X190 vs Mix**

| X190 vs Mix |    |           |        |        |        |              |        |        |        |           |        |        |        |           |        |        |        |
|-------------|----|-----------|--------|--------|--------|--------------|--------|--------|--------|-----------|--------|--------|--------|-----------|--------|--------|--------|
| Type        |    | Mock (2d) |        |        |        | PEG6000 (2d) |        |        |        | Mock (5d) |        |        |        | NaCl (5d) |        |        |        |
|             |    | Mode 4    | Mode 5 | Mode 6 | Mode 7 | Mode 4       | Mode 5 | Mode 6 | Mode 7 | Mode 4    | Mode 5 | Mode 6 | Mode 7 | Mode 4    | Mode 5 | Mode 6 | Mode 7 |
| A↑          | D↑ | 3         | 0      | 2      | 3      | 9            | 1      | 3      | 5      | 26        | 17     | 7      | 8      | 5         | 1      | 1      | 3      |
| A=          | D↑ | 77        | 0      | 0      | 21     | 111          | 0      | 0      | 56     | 77        | 0      | 0      | 46     | 133       | 0      | 0      | 99     |
| A↓          | D↑ | 4         | 0      | 0      | 0      | 5            | 0      | 0      | 3      | 8         | 0      | 0      | 2      | 3         | 0      | 0      | 3      |
| A=          | D↓ | 0         | 49     | 22     | 0      | 0            | 81     | 44     | 0      | 0         | 35     | 34     | 0      | 0         | 127    | 108    | 0      |
| A↓          | D↓ | 12        | 6      | 6      | 8      | 3            | 9      | 1      | 2      | 21        | 8      | 6      | 11     | 0         | 3      | 3      | 2      |
| A↓          | D= | 89        | 0      | 0      | 53     | 61           | 0      | 0      | 59     | 99        | 0      | 0      | 59     | 32        | 0      | 0      | 33     |
| A↑          | D↓ | 0         | 1      | 0      | 0      | 0            | 3      | 4      | 0      | 0         | 1      | 0      | 0      | 0         | 3      | 1      | 0      |
| A↑          | D= | 0         | 35     | 12     | 0      | 0            | 67     | 37     | 0      | 0         | 78     | 32     | 0      | 0         | 38     | 26     | 0      |
| A=          | D= | 250       | 206    | 100    | 110    | 192          | 194    | 146    | 191    | 182       | 159    | 67     | 95     | 185       | 190    | 150    | 156    |

A↑, the A homeolog was upregulated, A↓, the A homeolog was downregulated, A=, the A homeolog was unchanged, D↑, the D homeolog was upregulated, D↓, the D homeolog was downregulated, D=, the D homeolog was unchanged.
