# Supplementary material for: Effects of Allopolyploidization and Homoeologous Chromosomal Segment Exchange on Homoeolog Expression in a Synthetic Allotetraploid Wheat under Variable Environmental Conditions
Source: Plants (Basel). 2023 Aug 30;12(17):3111. doi: 10.3390/plants12173111 (PMC10490264; doi:10.3390/plants12173111)
Supplement: Supplementary file 1 [file plants-12-03111-s001.zip › Supplementary Dataset.xlsx]

## Sheet: Sheet1
List of all over-represented GO/Pfam terms in each comparison.
"Anno", GO/Pfam term ID.
"num_M", represents total investigated gene numbers in a GO/Pfam term.
"num_m", represents gene numbers of this group belong to a GO/Pfam term.
"pvalue", p-value calculated by hypergeometric method.
"qvalue", adjusted p-value by FDR method.
"Description", description of GO/Pfam term.
"class" represents "biological process","cellular components" and "molecular function".

## Sheet: EUP vs Mix mock2d A genome
Anno	num_M	num_m	pvalue	qvalue	Description	class
GO:0020037	173	59	1.04647e-13	6.01722e-11	heme binding	molecular_function
GO:0005506	151	46	3.84885e-09	1.10654e-06	iron ion binding	molecular_function
GO:0004497	121	39	1.03991e-08	1.49487e-06	monooxygenase activity	molecular_function
GO:0016705	121	39	1.03991e-08	1.49487e-06	oxidoreductase activity, acting on paired donors, with incorporation or reduction of molecular oxygen	molecular_function
GO:0048544	46	20	1.77756e-07	2.04419e-05	recognition of pollen	biological_process
GO:0006979	51	21	2.70542e-07	2.59269e-05	response to oxidative stress	biological_process
GO:0004601	50	20	9.08751e-07	7.46474e-05	peroxidase activity	molecular_function
GO:0016020	849	152	1.37185e-06	9.86014e-05	membrane	cellular_component
GO:0006468	743	136	1.55987e-06	9.96584e-05	protein phosphorylation	biological_process
GO:0004672	746	136	1.96056e-06	0.000112732	protein kinase activity	molecular_function
GO:0016491	186	46	3.31406e-06	0.00012847	oxidoreductase activity	molecular_function
GO:0042744	37	16	3.33322e-06	0.00012847	hydrogen peroxide catabolic process	biological_process
GO:0004568	13	9	3.35139e-06	0.00012847	chitinase activity	molecular_function
GO:0006032	13	9	3.35139e-06	0.00012847	chitin catabolic process	biological_process
GO:0016998	13	9	3.35139e-06	0.00012847	cell wall macromolecule catabolic process	biological_process
GO:0019752	14	9	8.33628e-06	0.000299585	carboxylic acid metabolic process	biological_process
GO:0030246	44	17	1.04204e-05	0.000352454	carbohydrate binding	molecular_function
GO:0016830	13	8	4.32869e-05	0.00138278	carbon-carbon lyase activity	molecular_function
GO:0008061	6	5	0.000166448	0.00503723	chitin binding	molecular_function
GO:0015276	12	7	0.000215433	0.00619369	ligand-gated monoatomic ion channel activity	molecular_function
GO:0030145	17	8	0.000513528	0.0140609	manganese ion binding	molecular_function
GO:0009765	14	7	0.000742651	0.0194102	photosynthesis, light harvesting	biological_process
GO:0050661	19	8	0.00126692	0.0316731	NADP binding	molecular_function
GO:0030247	47	14	0.00137486	0.0329394	polysaccharide binding	molecular_function
GO:0004364	28	10	0.0014477	0.033297	glutathione transferase activity	molecular_function
GO:0006749	24	9	0.00168237	0.0372062	glutathione metabolic process	biological_process

## Sheet: EUP vs Mix mock2d D genome
Anno	num_M	num_m	pvalue	qvalue	Description	class
GO:0020037	218	80	1.99865e-09	1.29113e-06	heme binding	molecular_function
GO:0005506	203	74	1.12179e-08	3.62337e-06	iron ion binding	molecular_function
GO:0004497	166	62	6.17703e-08	9.9759e-06	monooxygenase activity	molecular_function
GO:0016705	166	62	6.17703e-08	9.9759e-06	oxidoreductase activity, acting on paired donors, with incorporation or reduction of molecular oxygen	molecular_function
GO:0030246	74	33	8.03884e-07	0.000103862	carbohydrate binding	molecular_function
GO:0009765	10	9	3.4261e-06	0.000368877	photosynthesis, light harvesting	biological_process
GO:0004364	40	20	1.48868e-05	0.00137384	glutathione transferase activity	molecular_function
GO:0006468	942	234	1.88826e-05	0.00152181	protein phosphorylation	biological_process
GO:0016020	994	245	2.12017e-05	0.00152181	membrane	cellular_component
GO:0004672	946	234	2.56635e-05	0.00165786	protein kinase activity	molecular_function
GO:0016491	222	68	4.74899e-05	0.00278895	oxidoreductase activity	molecular_function
GO:0006749	34	17	6.51755e-05	0.00350862	glutathione metabolic process	biological_process
GO:0030247	69	27	0.000130755	0.00649753	polysaccharide binding	molecular_function
GO:0016616	49	21	0.000160644	0.00726736	oxidoreductase activity, acting on the CH-OH group of donors, NAD or NADP as acceptor	molecular_function
GO:0005975	198	60	0.00017968	0.00726736	carbohydrate metabolic process	biological_process
GO:0004568	16	10	0.000202496	0.00726736	chitinase activity	molecular_function
GO:0006032	16	10	0.000202496	0.00726736	chitin catabolic process	biological_process
GO:0016998	16	10	0.000202496	0.00726736	cell wall macromolecule catabolic process	biological_process
GO:0008194	118	38	0.000740448	0.0251752	UDP-glycosyltransferase activity	molecular_function
GO:0004553	127	40	0.000890767	0.0287718	hydrolase activity, hydrolyzing O-glycosyl compounds	molecular_function
GO:0051082	34	15	0.000951951	0.0292838	unfolded protein binding	molecular_function
GO:0004427	6	5	0.00143706	0.0421973	inorganic diphosphate phosphatase activity	molecular_function
GO:0004601	53	20	0.0016008	0.0449616	peroxidase activity	molecular_function

## Sheet: EUP vs Mix mock5d A genome
Anno	num_M	num_m	pvalue	qvalue	Description	class

## Sheet: EUP vs Mix mock5d D genome
Anno	num_M	num_m	pvalue	qvalue	Description	class
GO:0003735	246	30	5.85065e-08	3.77952e-05	structural constituent of ribosome	molecular_function
GO:0005840	226	27	4.15207e-07	0.000134112	ribosome	cellular_component
GO:0006412	232	27	7.02614e-07	0.000151296	translation	biological_process

## Sheet: EUP vs Mix PEG6000-2d A genome
Anno	num_M	num_m	pvalue	qvalue	Description	class

## Sheet: EUP vs Mix PEG6000-2d D genome
Anno	num_M	num_m	pvalue	qvalue	Description	class
GO:0004672	946	268	1.61474e-08	8.26419e-06	protein kinase activity	molecular_function
GO:0006468	942	266	2.55857e-08	8.26419e-06	protein phosphorylation	biological_process

## Sheet: EUP vs Mix NaCl-5d A genome
Anno	num_M	num_m	pvalue	qvalue	Description	class
GO:0006418	39	14	5.64507e-07	0.000185412	tRNA aminoacylation for protein translation	biological_process
GO:0004812	45	15	6.7303e-07	0.000185412	aminoacyl-tRNA ligase activity	molecular_function
GO:0000166	58	17	9.67365e-07	0.000185412	nucleotide binding	molecular_function
GO:0003735	198	31	0.000109143	0.0156893	structural constituent of ribosome	molecular_function
GO:0005840	183	29	0.000145491	0.0167315	ribosome	cellular_component
GO:0006412	188	29	0.000234654	0.0224877	translation	biological_process

## Sheet: EUP vs Mix NaCl-5d D genome
Anno	num_M	num_m	pvalue	qvalue	Description	class
GO:0003735	246	76	1.73691e-19	1.12204e-16	structural constituent of ribosome	molecular_function
GO:0006412	232	72	1.22226e-18	3.94789e-16	translation	biological_process
GO:0005840	226	70	4.23052e-18	9.10972e-16	ribosome	cellular_component
GO:0045944	23	9	0.000267079	0.0431333	positive regulation of transcription by RNA polymerase II	biological_process

## Sheet: X190 vs Mix mock2d A genome
Anno	num_M	num_m	pvalue	qvalue	Description	class
GO:0020037	173	68	1.33748e-13	7.69049e-11	heme binding	molecular_function
GO:0006468	743	186	5.03041e-11	1.39506e-08	protein phosphorylation	biological_process
GO:0004672	746	186	7.27855e-11	1.39506e-08	protein kinase activity	molecular_function
GO:0030246	44	25	8.2413e-10	1.18469e-07	carbohydrate binding	molecular_function
GO:0048544	46	25	2.91736e-09	3.35496e-07	recognition of pollen	biological_process
GO:0004497	121	46	4.47669e-09	3.67728e-07	monooxygenase activity	molecular_function
GO:0016705	121	46	4.47669e-09	3.67728e-07	oxidoreductase activity, acting on paired donors, with incorporation or reduction of molecular oxygen	molecular_function
GO:0016020	849	194	5.59783e-08	4.02344e-06	membrane	cellular_component
GO:0055085	362	97	1.02621e-07	6.55631e-06	transmembrane transport	biological_process
GO:0004364	28	17	1.153e-07	6.62974e-06	glutathione transferase activity	molecular_function
GO:0030247	47	23	1.64371e-07	8.59212e-06	polysaccharide binding	molecular_function
GO:0006749	24	15	3.83361e-07	1.83694e-05	glutathione metabolic process	biological_process
GO:0005506	151	49	4.75203e-07	2.10186e-05	iron ion binding	molecular_function
GO:0008194	94	35	5.64253e-07	2.31747e-05	UDP-glycosyltransferase activity	molecular_function
GO:0005975	150	47	2.47214e-06	9.47654e-05	carbohydrate metabolic process	biological_process
GO:0042744	37	18	4.09534e-06	0.000147176	hydrogen peroxide catabolic process	biological_process
GO:0006979	51	21	1.74337e-05	0.000589669	response to oxidative stress	biological_process
GO:0004568	13	9	2.82874e-05	0.000774536	chitinase activity	molecular_function
GO:0006032	13	9	2.82874e-05	0.000774536	chitin catabolic process	biological_process
GO:0016702	13	9	2.82874e-05	0.000774536	oxidoreductase activity, acting on single donors with incorporation of molecular oxygen, incorporation of two atoms of oxygen	molecular_function
GO:0016998	13	9	2.82874e-05	0.000774536	cell wall macromolecule catabolic process	biological_process
GO:0019752	14	9	6.782e-05	0.00177257	carboxylic acid metabolic process	biological_process
GO:0140359	72	25	8.84474e-05	0.00221119	ABC-type transporter activity	molecular_function
GO:0004553	102	32	9.43575e-05	0.00226065	hydrolase activity, hydrolyzing O-glycosyl compounds	molecular_function
GO:0015276	12	8	0.000122742	0.00282307	ligand-gated monoatomic ion channel activity	molecular_function
GO:0004601	50	19	0.000158442	0.003504	peroxidase activity	molecular_function
GO:0016830	13	8	0.00027387	0.00583241	carbon-carbon lyase activity	molecular_function
GO:0022857	188	49	0.000311931	0.00640574	transmembrane transporter activity	molecular_function
GO:0008061	6	5	0.000570167	0.011305	chitin binding	molecular_function
GO:0015144	24	11	0.00061042	0.0116997	carbohydrate transmembrane transporter activity	molecular_function
GO:0005504	9	6	0.000953179	0.0171274	fatty acid binding	molecular_function
GO:0009627	9	6	0.000953179	0.0171274	systemic acquired resistance	biological_process
GO:0004867	13	7	0.0019793	0.0344879	serine-type endopeptidase inhibitor activity	molecular_function
GO:0006508	186	45	0.00276822	0.0468155	proteolysis	biological_process

[truncated: 7 more sheets: X190 vs Mix mock2d D genome, X190 vs Mix mock5d A genome, X190 vs Mix mock5d D genome, X190 vs Mix PEG6000-2d A genome, X190 vs Mix PEG6000-2d D genome, X190 vs Mix NaCl-5d A genome, X190 vs Mix NaCl-5d D genome]
