# Supplementary figures and images for: Effects of Allopolyploidization and Homoeologous Chromosomal Segment Exchange on Homoeolog Expression in a Synthetic Allotetraploid Wheat under Variable Environmental Conditions
Source: MDPI journal article supplement (doi:10.3390/plants12173111), 2023-08-30

Figure S1. Summary of DEGs on each chromosome.

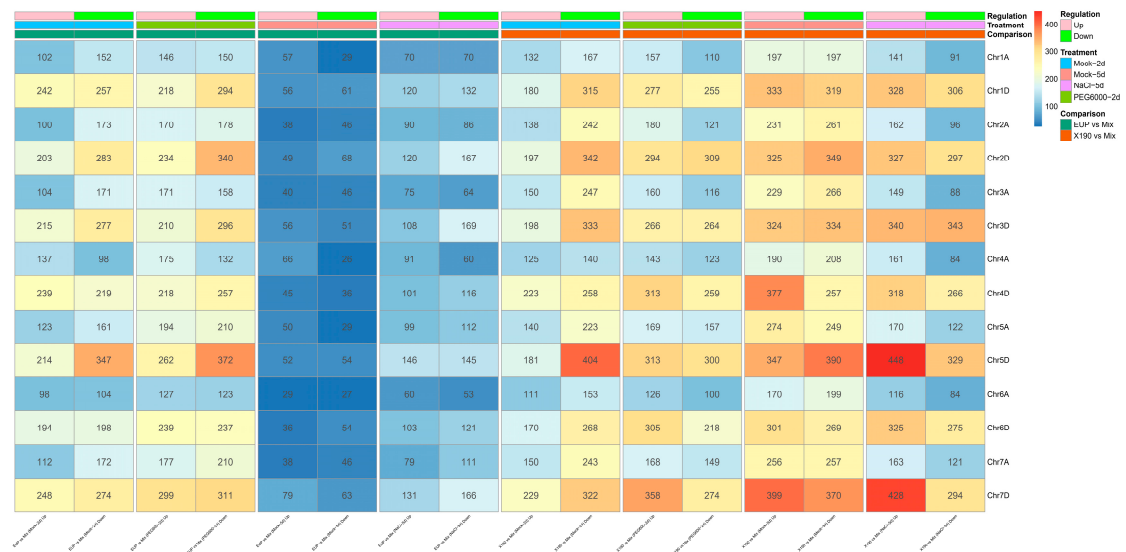

Supplement: s1 [file s1]
